# Supplementary material
Source: PubMed Central journal article supplement (PMC7383148)
Supplement: NIHMS1610243-supplement-1.pdf [file NIHMS1610243-supplement-1.pdf]

**Cell Reports, Volume 32**

**Supplemental Information**

**Inflammation-Induced Lactate Leads to Rapid Loss  
of Hepatic Tissue-Resident NK Cells**

**Garvin Dodard, Angela Tata, Timothy K. Erick, Diego Jaime, S.M. Shahjahan Miah, Linda Quatrini, Bertrand Escalière, Sophie Ugolini, Eric Vivier, and Laurent Brossay**

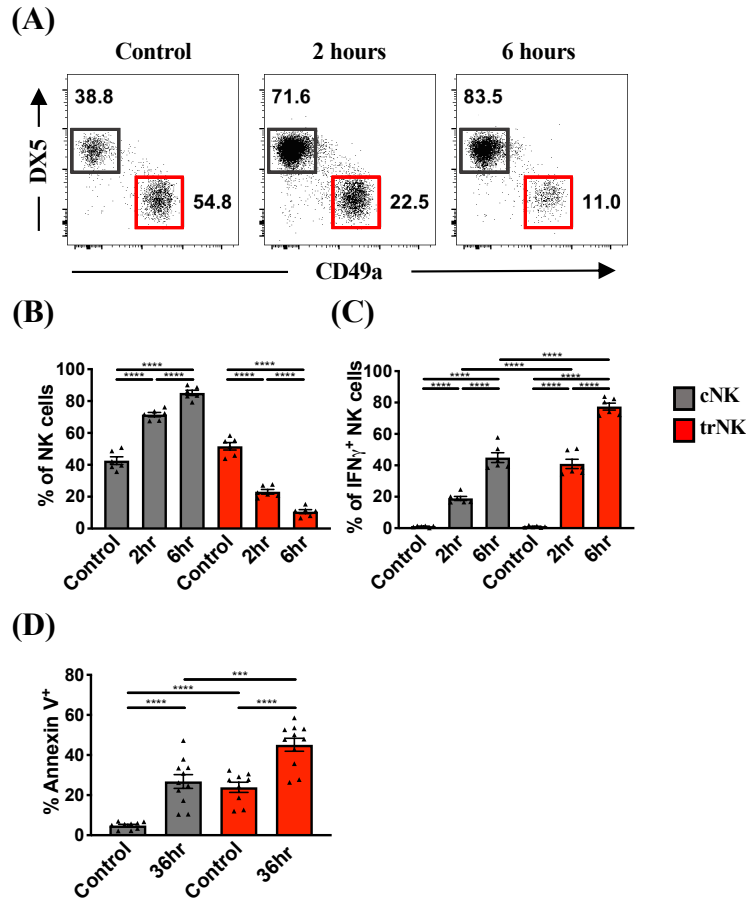

**Supplementary Figure 1**

**Liver trNK cells serve as early responders to stimuli within the liver microenvironment prior to cell death. Related to Figures 1 and 2.** (A) Representative staining of liver cNK (grey) and trNK (red) cell populations at 2 and 6 hours post  $\alpha$ -GalCer stimulation. (B) Frequency of liver cNK and trNK cells at 2 and 6 hours post  $\alpha$ -GalCer stimulation (n = 6). (C) Frequency of IFN $\gamma$ <sup>+</sup> liver cNK and trNK cells at 2 and 6 hours post  $\alpha$ -GalCer stimulation (n = 6). (D) Frequency of Annexin V<sup>+</sup> liver cNK and trNK cell populations at 36 hours post  $\alpha$ -GalCer stimulation (n = 9-11). (Data are representative of (A) or pooled from 2-3 experiments (B-D), error bars indicate S.E.M.)

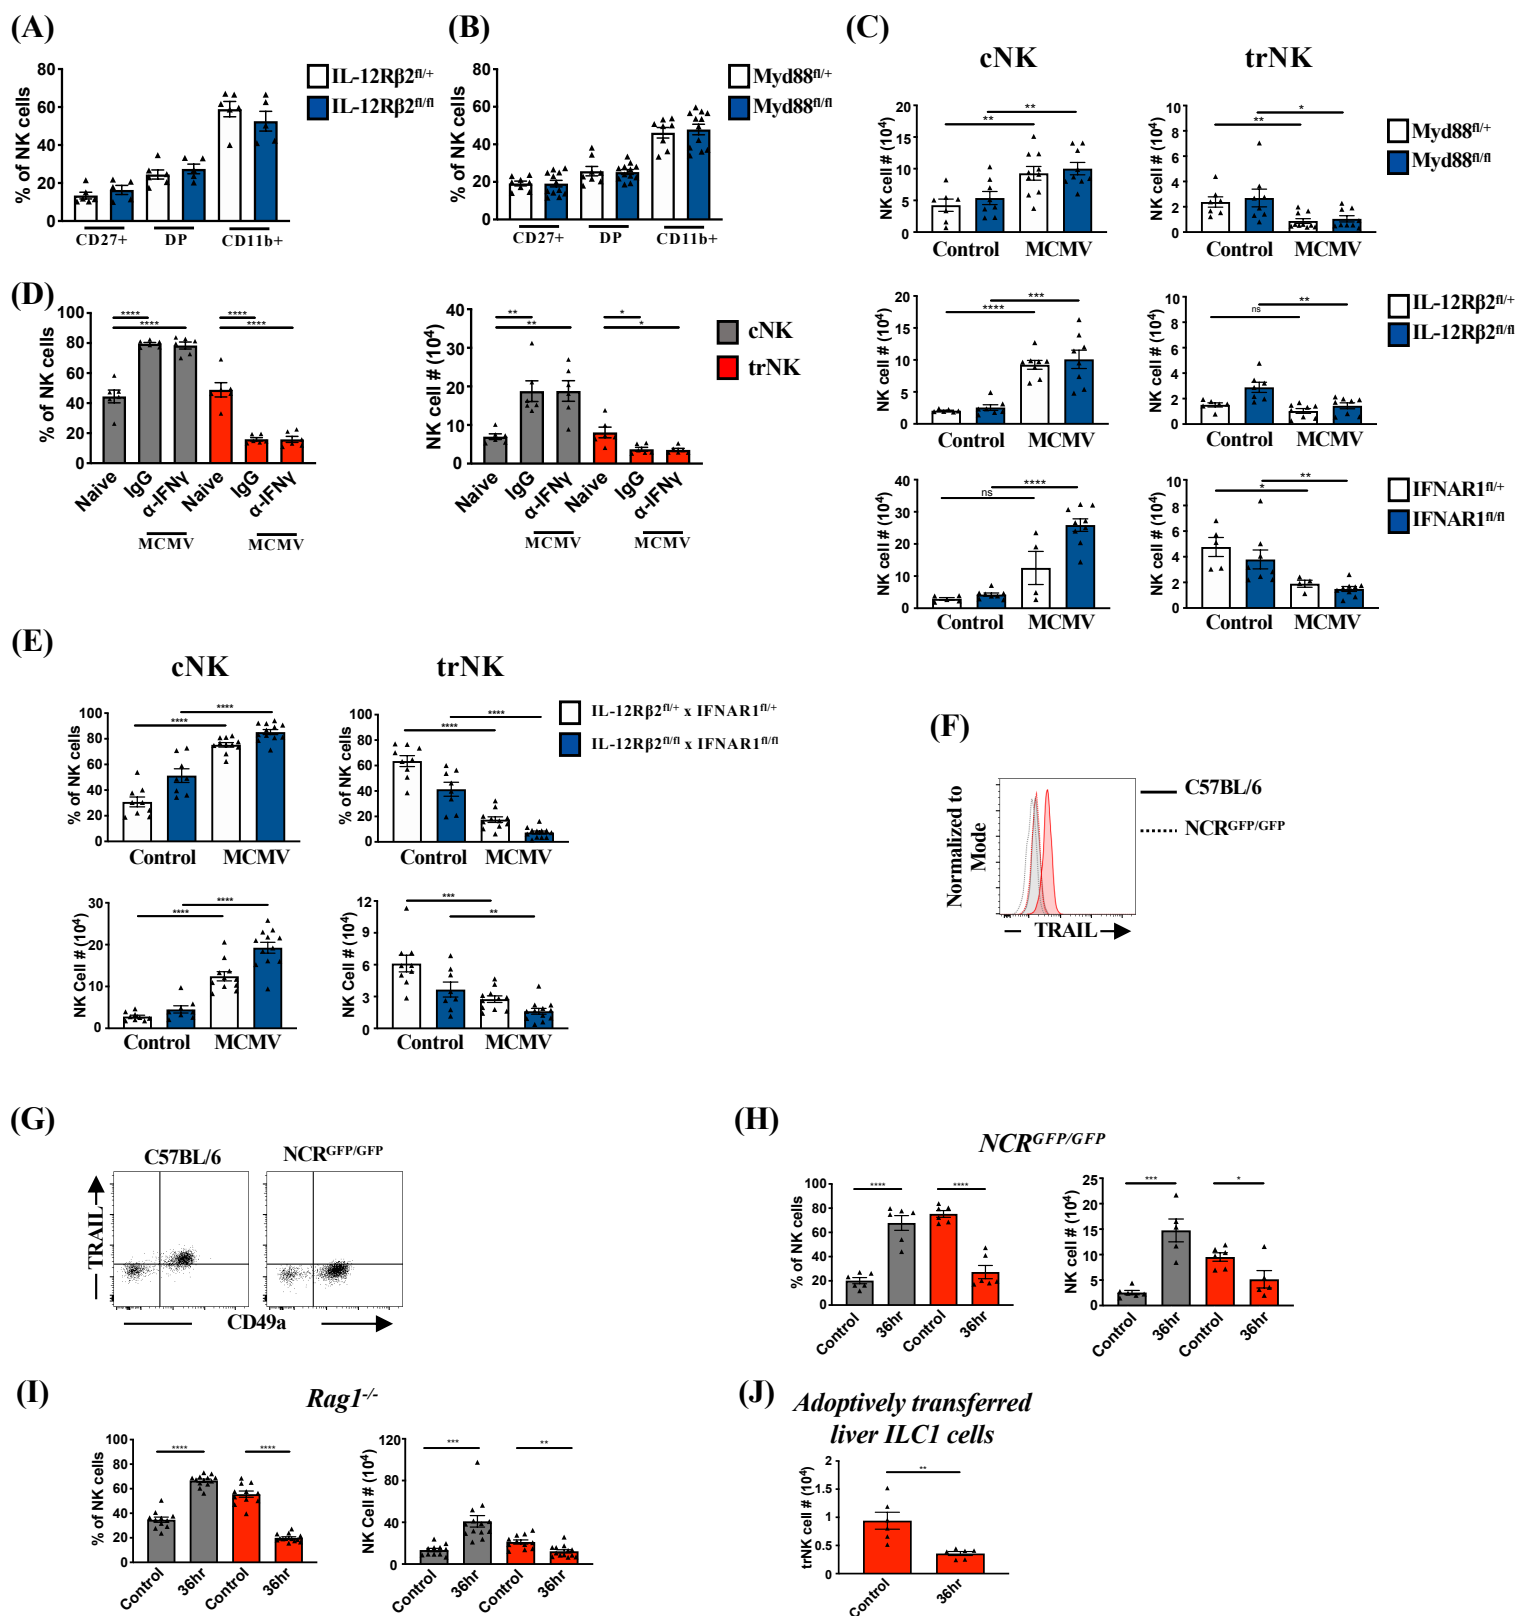

Supplementary Figure 2

**Liver trNK cell disappearance is independent of IL-1, IL-12, IL-18, Type I, Type II IFN, TRAIL signaling, and other lymphocyte populations. Related to Figure 3.** (A) Frequency of indicated NK cell maturation markers from IL-12Rβ2<sup>fl/n</sup> and IL-12Rβ2<sup>fl/het</sup> controls (n = 5-6). (B) Frequency of indicated NK cell maturation markers from MyD88<sup>fl/n</sup> and MyD88<sup>fl/het</sup> controls (n = 8-12). (C) Number of liver cNK and trNK cells from MyD88<sup>fl/n</sup> and MyD88<sup>fl/het</sup>, IFNAR1<sup>fl/n</sup> and IFNAR1<sup>fl/het</sup>, IL-12Rβ2<sup>fl/n</sup> and IL-12Rβ2<sup>fl/het</sup> controls 36 hours post-MCMV infection (n = 4-10). (D) Frequency and number of liver cNK and trNK cell populations of mice treated with IFNγ blocking antibody or isotype control 36 hours post-MCMV infection (n = 6). (E) Frequency and number of liver NK cells from IL-12Rβ2<sup>fl/n</sup> x IFNAR1<sup>fl/n</sup> and IL-12Rβ2<sup>fl/het</sup> x IFNAR1<sup>fl/het</sup> controls 36 hours post-MCMV infection (n = 8-12). (F) TRAIL expression on liver cNK (grey) and trNK (red) in C57BL/6 and NCR<sup>GFP/GFP</sup> mice. (G) Representative staining of TRAIL expression on liver cNK (CD49a<sup>-</sup>) and trNK (CD49a<sup>+</sup>) cell populations in C57BL/6 and NCR<sup>GFP/GFP</sup> mice. (H) Frequency and number of liver cNK and trNK cell populations 36 hours post-MCMV infection of NCR<sup>GFP/GFP</sup> mice (n = 6). (I) Frequency and number of hepatic cNK and trNK cells 36 hours post-MCMV infection in Rag1<sup>-/-</sup> mice (n = 11-13). (J) Absolute cell number of adoptively transferred hepatic trNK cells 36 hours post-MCMV infection in Rag2<sup>-/-</sup>IL-2Rγ<sup>-/-</sup> mice (n = 6). (Data are representative of (F-G) or pooled from 2-3 experiments (A-E,H-J), error bars indicate S.E.M.)

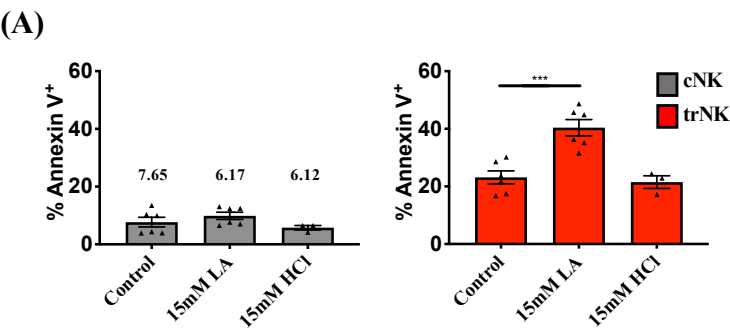

(B)

|                           | Naïve <sup>a</sup> | 44hr MCMV <sup>b</sup> |
|---------------------------|--------------------|------------------------|
| <b>ROS Production</b>     |                    |                        |
| Nox2                      | *                  | 4.13                   |
| <b>Mitochondria</b>       |                    |                        |
| mmp9                      | 13.35              | 6.19                   |
| Osgin1                    | 4.12               | 5.21                   |
| Car5b                     | -15.57             | -1.55                  |
| Gimap3                    | 2.06               | -5.88                  |
| Bnip3                     | *                  | 4.02                   |
| Prkn                      | *                  | -7.14                  |
| <b>Cellular Apoptosis</b> |                    |                        |
| P2Rx7                     | 5.54               | 6.18                   |
| <b>Lactate Metabolism</b> |                    |                        |
| Ldhb                      | *                  | 8.47                   |
| Slc16a3                   | *                  | 4.00                   |

(C)

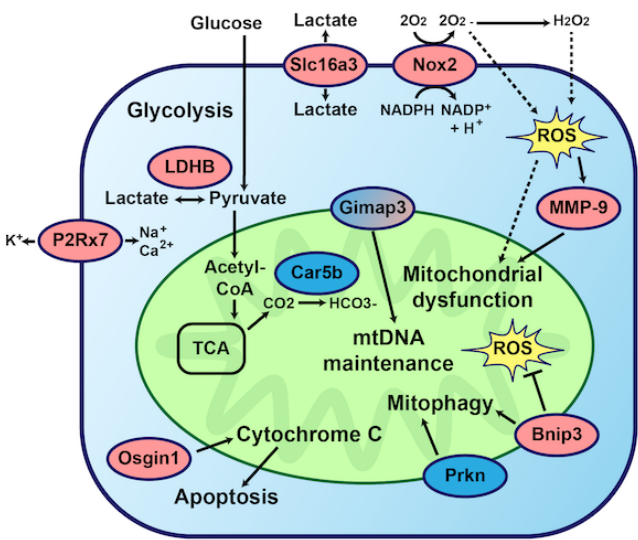

Supplementary Figure 3

Genes differentially expressed between liver trNK cell and cNK cells by four functional categories. Related to Figure 4. (A) Frequency of Annexin V<sup>+</sup> liver cNK (grey) and trNK (red) cells following 4 hours incubation in control media (pH7.65), 15mM lactic acid (pH 6.17), and 15mM HCl (pH 6.12) (n = 6). (B) Table of genes differentially expressed between liver NK cell populations. Higher transcript expression in cNK cells (blue). Higher transcript expression in trNK cells (red). a – Robinette *et al.* Transcriptional programs define molecular characteristics of innate lymphoid cell classes and subsets. *Nature immunology* 16:306-317. b – Quatrini *et al.* Endogenous glucocorticoids control host resistance to viral infection through the tissue-specific regulation of PD-1 expression on NK cells. *Nature immunology* 19:954-962. \* - expression levels below a 2-fold difference were not included in analysis. (C) Model of indicated genes and their roles in functional pathways. (Data are representative of (B-C) or pooled from 1-2 experiments (A), error bars indicate S.E.M.)
